# Supplementary material for: Fear extinction is regulated by long noncoding RNA activity at the synapse
Source: bioRxiv or medRxiv preprint supplement (doi:10.1101/2022.03.30.486308), 2022-03-31
Supplement: Supplementary file [file media-2.pdf]

## Supplemental Table S2

### Primers for quantitative PCR

| Name                                     | Forward Sequence (5'-3')    | Reverse Sequence (5'-3')    |
|------------------------------------------|-----------------------------|-----------------------------|
| Exon 11 - Intron 11 - Exon 12            | GCTCCTGTGACAAGTGGA<br>CA    | GCACCTGCAACAACCAAC<br>AG    |
| Intron 9 - Exon 10                       | CTGTGCCACTGACTTAAC<br>CC    | TCAGAATGAAGGACCGGA<br>AA    |
| Intron 8 - Exon11                        | AGGTACTGTTAGTGATGA<br>TC    | ATGTCCACTTGTCACAGG<br>AG    |
| Exon 2 - Intron 2                        | AATGGCAGTGTGGACCTC<br>TG    | TCAGTCCCCTTCTTCACGG<br>A    |
| Intron 5                                 | GAACAAATACTGACTACC<br>TG    | TGCCCCACAATAAATGTC<br>AA    |
| Exon 1-Exon 2-Exon 3                     | ATTCTGAGCAGGAATGGC<br>AG    | TCCTCCTTTGCCACAGAAC<br>T    |
| Exon 8-Exon 9-Exon<br>10-Exon 11-Exon 12 | GTACAAATAATGGTTTGA<br>AT    | TGTTATAATACACTTTAAT<br>G    |
| <i>Gas5</i>                              | GGAAGCTGGATAACAGA<br>GCGA   | GCATGCAACCAGTTAACT<br>TTCA  |
| 18S rRNA                                 | CTGGATACCGCAGCTAGG<br>AA    | GAATTTACCTCTAGCGG<br>CG     |
| <i>Pgk</i>                               | TGCACGCTTCAAAGCGC<br>ACG    | AAGTCCACCCTCATCACG<br>ACCC  |
| <i>Rpph1</i>                             | CTCTACGCTTGGGCAGAC          | CTCACCTCAGCCATTGAA<br>CT    |
| <i>Rmrp</i>                              | CCTGTTTCCTAGGCTACA<br>TACG  | GCGGGCTAACAGTGACTT          |
| <i>Rn7sk</i>                             | TCGGTCAAGGGTATACGA<br>GTAG  | TTTGGATGTGTCTGGAGTC<br>TTG  |
| <i>9330121K16Rik</i>                     | AGTAGAGTTAGGGTGGGA<br>TAGG  | ACAGGCACTGATGTGAGT<br>TAG   |
| <i>Gm28437</i>                           | CAGGATTCTTCTGAGCGT<br>TCTAT | TGGGACTTCTAGAGGGTT<br>AAGT  |
| <i>GM47305</i>                           | AGACAGGAGGATCGCTTG<br>A     | TCACCATATTGATGCCGA<br>ACTTA |
| <i>Cyrano</i>                            | GGCTCCATAGAAGCGACA<br>TAC   | CCCAAGAGCTGGGCATAA<br>A     |
| <i>Meg3</i>                              | ATTAGGCCAAAGCCATCA<br>TCT   | GGCGCTTCCAATCGATTT<br>AC    |

### Primers for *in-vitro* Transcription

| Name                           | Sequence (5'-3')                      |
|--------------------------------|---------------------------------------|
| T7 <i>Gas5</i> del1-50         | TAATACGACTCACTATAGGGTGATGGGACATCTTGTG |
| T7 <i>Gas5</i>                 | TAATACGACTCACTATAGGAGCCTTTCGGAGCTGTGC |
| <i>Gas5</i> Reverse            | TTCATGTTATAATACTTT                    |
| <i>Gas5</i> del458-504 Reverse | ATTTGAGCCTCCATCCAGGC                  |

### CIRTS gRNA

| Name             | Sequence (5'-3')               |
|------------------|--------------------------------|
| <i>Gas5</i> gRNA | AGCAAGCCAGCCAAATGAACAAGCATGCAA |
| Control Scramble | GATACATCATCTCTGTATTAGGCTCCCAAC |
